# Supplementary material for: Marek’s disease virus US3 protein kinase phosphorylates chicken HDAC 1 and 2 and regulates viral replication and pathogenesis
Source: PubMed Central journal article supplement (PMC7920345; doi:10.1371/journal.ppat.1009307), 2021-02-17
Supplement: ppat.1009307.s002.pdf [file ppat.1009307.s002.pdf]

## S2 Fig

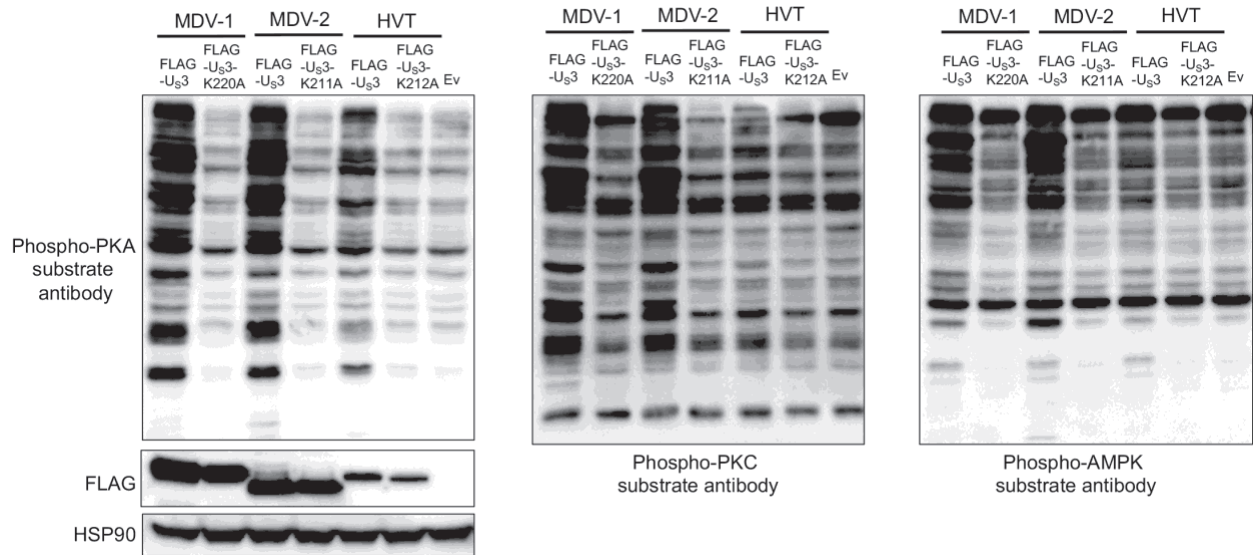

**S2 Fig. MDV Us3 induces phosphorylation of cellular protein kinase substrates.** pcDNA FLAG tagged wild type MDV-1, MDV-2, or HVT Us3, pcDNA kinase dead Us3 (pcDNA-FLAG-U<sub>s</sub>3-K220A for MDV-1, pcDNA-FLAG-U<sub>s</sub>3-K211A for MDV-2, and pcDNA-FLAG-U<sub>s</sub>3-K212A for HVT), or pcDNA empty vector (Ev) were co-transfected into 293T cells. After 48 hours, whole cell lysates were subjected to Western blot with anti-phospho-PKA substrate antibody (left), anti-phospho-PKC substrate antibody (middle), and anti-phospho-AMPK substrate antibody (right). Staining for FLAG and HSP90 was performed to show Us3 expression and protein loading control, respectively.
