# Supplementary material for: Marek’s disease virus US3 protein kinase phosphorylates chicken HDAC 1 and 2 and regulates viral replication and pathogenesis
Source: PubMed Central journal article supplement (PMC7920345; doi:10.1371/journal.ppat.1009307), 2021-02-17
Supplement: ppat.1009307.s004.pdf [file ppat.1009307.s004.pdf]

|    | A                                                                                               | B                       | C                                                                                     | D                                                                  |
|----|-------------------------------------------------------------------------------------------------|-------------------------|---------------------------------------------------------------------------------------|--------------------------------------------------------------------|
| 1  | <b>S1 Table.</b> List of primers used in MDV-1 BAC mutagenesis and pcDNA plasmid constructions. |                         |                                                                                       |                                                                    |
| 2  |                                                                                                 |                         |                                                                                       |                                                                    |
| 3  | Primer number                                                                                   | Primer name             | Sequence (5' to 3')                                                                   | Purpose                                                            |
| 4  | 1                                                                                               | MDV-2/Us3_F             | GATCGAATTCATGGAACTAACAGCTTTC                                                          | Generation of MDV-1-MDV-2/US3 BAC                                  |
| 5  | 2                                                                                               | MDV-2/Us3_R             | GATCGGATCCCTTAGGGAAACAAATAGGGCCGTGGA                                                  |                                                                    |
| 6  | 3                                                                                               | MDV-2/Us3Kan-F          | GATCGATATCTGGAGTGCCGGCTTGTGTTATTCGAGATGTCTGCCAAAAAAGGAC<br>ACTAGGATGACGACGATAAGTAGGG  |                                                                    |
| 7  | 4                                                                                               | MDV-2/Us3Kan-R          | GATCGATATCCAACCAATTAACCAATTCTGATTAG                                                   |                                                                    |
| 8  | 5                                                                                               | MDV-2/Us3-T-F           | TTATACTCTGGTAGAATATGAAACAGGGTAAAACAGGTAATAGACTGGATGGAAACT<br>AACGAGCTTTC              |                                                                    |
| 9  | 6                                                                                               | MDV-2/Us3-T-R           | GCGTAGTATATATTAAAAATGAATCATTGAAGTTATTTTTGACGGGTGTTAGGGAACA<br>AATAGGGCCGTGGA          |                                                                    |
| 10 | 7                                                                                               | HVT/Us3_F               | GATCGAATTCATGGAAGTAGATGTTGAGTC                                                        | Generation of MDV-1-HVT/US3 BAC                                    |
| 11 | 8                                                                                               | HVT/Us3_R               | GATCGGATCCCTTAGACACTGTGAGGGGTGTGATA                                                   |                                                                    |
| 12 | 9                                                                                               | HVT/Us3Kan-F            | GATCGATATCAGGGAAGTGGATTTTTAAAAACCATCTCACATAAATCAATTATAAAAT<br>TAGGATGACGACGATAAGTAGGG |                                                                    |
| 13 | 10                                                                                              | HVT/Us3Kan-R            | GATCGATATCCAACCAATTAACCAATTCTGATTAG                                                   |                                                                    |
| 14 | 11                                                                                              | HVT/Us3-T-F             | TTATACTCTGGTAGAATATGAAACAGGGTAAAACAGGTAATAGACTGGATGGAAAGTA<br>GATGTTGAGTC             |                                                                    |
| 15 | 12                                                                                              | HVT/Us3-T-R             | GCGTAGTATATATTAAAAATGAATCATTGAAGTTATTTTTGACGGGTGTTAGACTCTG<br>TCAGAGGGGTGTGATA        |                                                                    |
| 16 | 13                                                                                              | MDV-1/Us3_F             | GATCGAATTCATGCTTCGAGTCCGGAGGC                                                         | Generation of MDV-1-ΔUS3_Rev BAC                                   |
| 17 | 14                                                                                              | MDV-1/Us3_R             | GATCGGATCCCTTACATATGAGCGGCAGTTA                                                       |                                                                    |
| 18 | 15                                                                                              | MDV-1/Us3Kan-F          | GATCGATATCATGGGACCATTGCCACTAAAACAAATAATTACGATAGAACGGGTTTG<br>CTAGGATGACGACGATAAGTAGGG |                                                                    |
| 19 | 16                                                                                              | MDV-1/Us3Kan-R          | GATCGATATCCAACCAATTAACCAATTCTGATTAG                                                   |                                                                    |
| 20 | 17                                                                                              | MDV-1/Us3-T-F           | TTATACTCTGGTAGAATATGAAACAGGGTAAAACAGGTAATAGACTGGATGCTTCG<br>AGTCCGGAGGC               |                                                                    |
| 21 | 18                                                                                              | MDV-1/Us3-T-R           | GCGTAGTATATATTAAAAATGAATCATTGAAGTTATTTTTGACGGGTGTTACATATGA<br>CGGCGAGTTATCG           |                                                                    |
| 22 | 19                                                                                              | MDV-1_Us3-FLAG-F        | TCGGATCCATGGACTACAAAGACGATGACGACAAGTCTTCGAGTCCGGAGGCA                                 | FLAG and HA tagged wild type and<br>kinase dead MDV-1 US3 plasmids |
| 23 | 20                                                                                              | MDV-1_Us3-HA-F          | TCGGATCCATGTACCCATACGATGTTCCAGATTACGCTTCTTCGAGTCCGGAGGCA                              |                                                                    |
| 24 | 21                                                                                              | MDV-1_Us3-R             | TCGAATTCATACATATGAGCGGCAGTTA                                                          |                                                                    |
| 25 | 22                                                                                              | MDV-1_Us3-K220A-F       | TGATGTAGCAACTGAAAAATA                                                                 | FLAG and HA tagged wild type and<br>kinase dead MDV-2 US3 plasmids |
| 26 | 23                                                                                              | MDV-1_Us3-K220A-R       | TATTTTCAGTTGCTACATCA                                                                  |                                                                    |
| 27 | 24                                                                                              | MDV-2_Us3-FLAG-F        | GATCGGATCCATGGACTACAAAGACGATGACGACAAG gaaactaacgagctttct                              |                                                                    |
| 28 | 25                                                                                              | MDV-2_Us3-HA-F          | GATCGGATCCATGTACCCATACGATGTTCCAGATTACGCT gaaactaacgagctttct                           | FLAG and HA tagged wild type and<br>kinase dead MDV-2 US3 plasmids |
| 29 | 26                                                                                              | MDV-2_Us3-R             | GATCGAATTCtaggggaaacaaataggcgctggagatt                                                |                                                                    |
| 30 | 27                                                                                              | MDV-2_Us3-K211A-F       | cgcgatgaGCgacagaaaac                                                                  |                                                                    |
| 31 | 28                                                                                              | MDV-2_Us3-K211A-R       | gtttctctcGCtacctcg                                                                    | FLAG and HA tagged wild type and<br>kinase dead HVT US3 plasmids   |
| 32 | 29                                                                                              | HVT_Us3-FLAG-F          | GATCGGATCCATGGACTACAAAGACGATGACGACAAG gaagtagatgttgagct                               |                                                                    |
| 33 | 30                                                                                              | HVT_Us3-HA-F            | GATCGGATCCATGTACCCATACGATGTTCCAGATTACGCT gaagtagatgttgagct                            |                                                                    |
| 34 | 31                                                                                              | HVT_Us3-R               | GATCGAATTCtagacaactgacaggggtgt                                                        | FLAG and HA tagged wild type and<br>kinase dead HVT US3 plasmids   |
| 35 | 32                                                                                              | HVT_Us3-K212A-F         | cgagacgtaGCgagcgagaat                                                                 |                                                                    |
| 36 | 33                                                                                              | HVT_Us3-K212A-R         | attctcgtcGCtacctcgt                                                                   |                                                                    |
| 37 | 34                                                                                              | MDV-1_Meq-HA-F          | TCGCTAGCATGTACCCATACGATGTTCCAGATTACGCTTCTCAGGAGCCAGAGCCG                              | HA tagged MDV-1 Meq plasmid                                        |
| 38 | 35                                                                                              | MDV-1_Meq-R             | GATCGCGGCCGCTCAGGGTCTCCCGTACCTG                                                       |                                                                    |
| 39 | 36                                                                                              | chHDAC1_FLAG-F          | gacGCTAGCcatgGACTACAAAGACGATGACGACAAG ggcctgacgcaggggac                               | FLAG, HA, and T7 tagged wild type<br>chHDAC1 plasmids              |
| 40 | 37                                                                                              | chHDAC1_HA-F            | gacGCTAGCcatgTACCCATACGATGTTCCAGATTACGCT ggcctgacgcaggggac                            |                                                                    |
| 41 | 38                                                                                              | chHDAC1_T7-F            | tcGCTAGCcatgATGGCTAGCATGATGGTGGACAGCAAATGGGT ggcctgacgcaggggac                        |                                                                    |
| 42 | 39                                                                                              | chHDAC1-R               | gacGCGGCCGCTtaggttgattttctctct                                                        | Single, double, and triple mutations of<br>chHDAC1 plasmids        |
| 43 | 40                                                                                              | chHDAC1-S393A-F         | gaagacGCgagagatgaaga                                                                  |                                                                    |
| 44 | 41                                                                                              | chHDAC1-S393A-R         | tctctctccCGctctct                                                                     |                                                                    |
| 45 | 42                                                                                              | chHDAC1-S406A-F         | gcattGCgacccgaattct                                                                   |                                                                    |
| 46 | 43                                                                                              | chHDAC1-S406A-R         | agaattgaggatCGCaatgc                                                                  |                                                                    |
| 47 | 44                                                                                              | chHDAC1-S410A-F         | ccgcaatGCgataagagaat                                                                  |                                                                    |
| 48 | 45                                                                                              | chHDAC1-S410A-R         | attctctatcCGcattgagg                                                                  |                                                                    |
| 49 | 46                                                                                              | chHDAC1-S415A-F         | gagaataGCggtgatgaag                                                                   |                                                                    |
| 50 | 47                                                                                              | chHDAC1-S415A-R         | cttcatcacaCGctattctc                                                                  |                                                                    |
| 51 | 48                                                                                              | chHDAC1-S421A-F         | tgaagaattcGCgacactg                                                                   |                                                                    |
| 52 | 49                                                                                              | chHDAC1-S421A-R         | cagagtcCGcgaattctca                                                                   |                                                                    |
| 53 | 50                                                                                              | chHDAC1-S423A-F         | lctgacGCgaaatgaagg                                                                    |                                                                    |
| 54 | 51                                                                                              | chHDAC1-S423A-R         | cctcatcttcCGctcaga                                                                    |                                                                    |
| 55 | 52                                                                                              | chHDAC1-T445A-R         | gacGCGGCCGCTtaggttgattttctctctcaaccccttggttggcttctctcttttctctctctctctctctct           |                                                                    |
| 56 | 53                                                                                              | chHDAC1-T477A-R         | cttctctctctctctctctctctctctctctctctcaacagcttgacctc                                    |                                                                    |
| 57 | 54                                                                                              | chHDAC1-S479A-R         | gacGCGGCCGCTtaGGTGGATTCCGctctctctca                                                   |                                                                    |
| 58 | 55                                                                                              | chHDAC1-T480A-R         | gacGCGGCCGCTtaCGCGATTGTctctctctca                                                     |                                                                    |
| 59 | 56                                                                                              | chHDAC1-S406/410A-F     | cctgagaagcgaattGCgacccgaatGCgataagagaatctctgtagaagaattc                               |                                                                    |
| 60 | 57                                                                                              | chHDAC1-S406/410A-R     | gaattctctcaacaggaattctctctctcCGcattgaggatCGCaatgctctctcagg                            |                                                                    |
| 61 | 58                                                                                              | chHDAC1-S406/410/415A-F | cctgagaagcgaattGCgacccgaatGCgataagagaatGCggtgatgaagaattc                              |                                                                    |
| 62 | 59                                                                                              | chHDAC1-S406/410/415A-R | gaattctctcaacCGctattctctctcCGcattgaggatCGCaatgctctctcagg                              |                                                                    |
| 63 | 60                                                                                              | chHDAC1-S406D-F         | cctgagaagcgaattGCatccgcaattct                                                         |                                                                    |
| 64 | 61                                                                                              | chHDAC1-S406D-R         | agaattgaggatGTCaatgctctctcagg                                                         |                                                                    |
| 65 | 62                                                                                              | chHDAC1-S410D-F         | cattcaatccgcaatGCgataagagaat                                                          |                                                                    |
| 66 | 63                                                                                              | chHDAC1-S410D-R         | attctctatcGTcattgaggatgaatg                                                           |                                                                    |
| 67 | 64                                                                                              | chHDAC1-S415D-F         | gagaataGACgtgatgaag                                                                   |                                                                    |
| 68 | 65                                                                                              | chHDAC1-S415D-R         | cttcatcacaGTCtattctc                                                                  |                                                                    |
| 69 | 66                                                                                              | chHDAC1-S406/410D-F     | cctgagaagcgaattGCatccgcaatGCgataagagaatctctgtagaagaattc                               |                                                                    |

|     | A                                                                                                         | B                       | C                                                                              | D                                                  |
|-----|-----------------------------------------------------------------------------------------------------------|-------------------------|--------------------------------------------------------------------------------|----------------------------------------------------|
| 70  | 67                                                                                                        | chHDAC1-S406/410D-R     | gaattctcatcacaggatattctcttctcGTCattgCGgatGTCaatgCGcttctcagg                    |                                                    |
| 71  | 68                                                                                                        | chHDAC1-S406/410/415D-F | cctgagaagcgcaattGACatccgcaatGACgataagagaataGACtgatgaagaattc                    |                                                    |
| 72  | 69                                                                                                        | chHDAC1-S406/410/415D-R | gaattctcatcacaGTCtattctcttctcGTCattgCGgatGTCaatgCGcttctcagg                    |                                                    |
| 73  | 70                                                                                                        | chHDAC2_FLAG-F          | gatc <b>GCTAGC</b> atg <b>GACTACAAGACGATGACGACAAG</b> gcglacagtcaggcg          |                                                    |
| 74  | 71                                                                                                        | chHDAC2_HA-F            | gatc <b>GCTAGC</b> atg <b>TACCCATACGATGTTCCAGATTACGCT</b> gcgtacagtcaggcg      | FLAG, HA, and T7 tagged wild type chHDAC2 plasmids |
| 75  | 72                                                                                                        | chHDAC2_T7-F            | tc <b>GCTAGC</b> atg <b>A TGGCTAGCATGACTGGTGGACAGCAAATGGGT</b> gcgtacagtcaggcg |                                                    |
| 76  | 73                                                                                                        | chHDAC2-R               | gatc <b>GCGGCCGC</b> tcaaggattgctgagctgtt                                      |                                                    |
| 77  | 74                                                                                                        | chHDAC2-S394A-F         | catgaagatGCGggagatga                                                           |                                                    |
| 78  | 75                                                                                                        | chHDAC2-S394A-R         | tcattctccCGCattctctcag                                                         |                                                    |
| 79  | 76                                                                                                        | chHDAC2-S407A-F         | aacgcattGCCattcgagca                                                           |                                                    |
| 80  | 77                                                                                                        | chHDAC2-S407A-R         | tgctcgaatCGCaatgctgt                                                           |                                                    |
| 81  | 78                                                                                                        | chHDAC2-S411A-F         | tattcgagcaGCGgataagc                                                           |                                                    |
| 82  | 79                                                                                                        | chHDAC2-S411A-R         | gcttaccCGCtgctgaata                                                            |                                                    |
| 83  | 80                                                                                                        | chHDAC2-S422A-F         | tgatgaggagtttCGGgact                                                           |                                                    |
| 84  | 81                                                                                                        | chHDAC2-S422A-R         | agtcCGCaaactctcatca                                                            |                                                    |
| 85  | 82                                                                                                        | chHDAC2-S424A-F         | ttttcagacGCGgaagatga                                                           |                                                    |
| 86  | 83                                                                                                        | chHDAC2-S424A-R         | tcattctccCGCgtctgaaaa                                                          |                                                    |
| 87  | 84                                                                                                        | chHDAC2-S407/411A-F     | gatccagacaaacgcattGCCattcgagcaGCGgataagcgcttgcctg                              |                                                    |
| 88  | 85                                                                                                        | chHDAC2-S407/411A-R     | caggcaatgcgcttctcCGCtgctcgaatCGCaatgctgttgcctgagtc                             |                                                    |
| 89  | 86                                                                                                        | chHDAC2-S407D-F         | aacgcattGCCattcgagca                                                           |                                                    |
| 90  | 87                                                                                                        | chHDAC2-S407D-R         | tgctcgaatGTCaatgctgt                                                           |                                                    |
| 91  | 88                                                                                                        | chHDAC2-S411D-F         | tattcgagcaGACgataagc                                                           |                                                    |
| 92  | 89                                                                                                        | chHDAC2-S411D-R         | gcttaccGTCtgctgaata                                                            |                                                    |
| 93  | 90                                                                                                        | chHDAC2-S407/411D-F     | gatccagacaaacgcattGCCattcgagcaGACgataagcgcttgcctg                              |                                                    |
| 94  | 91                                                                                                        | chHDAC2-S407/411D-R     | caggcaatgcgcttctcGTCtgctcgaatGTCaatgctgttgcctgagtc                             |                                                    |
| 95  | 92                                                                                                        | chHDAC1_qPCR_F          | GGATGAAGAAGAAGATCC                                                             |                                                    |
| 96  | 93                                                                                                        | chHDAC1_qPCR_R          | GATAACTATGCACTGACAGG                                                           |                                                    |
| 97  | 94                                                                                                        | chHDAC2_qPCR_F          | AAGGTGGACGGCGAAATG                                                             |                                                    |
| 98  | 95                                                                                                        | chHDAC2_qPCR_R          | GATACGGTCCATGCCAAATAG                                                          |                                                    |
| 99  | 96                                                                                                        | chp21_qPCR_F            | CGTAGACCACGAGCAGATCC                                                           |                                                    |
| 100 | 97                                                                                                        | chp21_qPCR_R            | AGGACCCTCTCCCACTTGAA                                                           |                                                    |
| 101 | 98                                                                                                        | chp27_qPCR_F            | AAACGGGAATTGCCAAACCG                                                           |                                                    |
| 102 | 99                                                                                                        | chp27_qPCR_R            | TGACTGCCAGCAACATCAGT                                                           |                                                    |
| 103 | 100                                                                                                       | chGAPDH_qPCR_F          | GTCAACGGATTTGGCCGTAT                                                           |                                                    |
| 104 | 101                                                                                                       | chGAPDH_qPCR_R          | CCACTTGGACTTTGCCAGAGA                                                          |                                                    |
| 105 | 102                                                                                                       | ICP4_F                  | CGCCACACGAGAACAATG                                                             |                                                    |
| 106 | 103                                                                                                       | ICP4_R                  | GGTTGGAGTAGAGCTGCAACTGT                                                        |                                                    |
| 107 | 104                                                                                                       | chGAPDH_F               | GTCAACGGATTTGGCCGTAT                                                           |                                                    |
| 108 | 105                                                                                                       | chGAPDH_R               | CCACTTGGACTTTGCCAGAGA                                                          |                                                    |
| 109 |                                                                                                           |                         |                                                                                |                                                    |
| 110 | * The sequences that highlighted in bold are restriction enzyme sites.                                    |                         |                                                                                |                                                    |
| 111 | ** The sequences that underlined were used to amplify the <i>Kan</i> gene cassette from pEPKan-S plasmid. |                         |                                                                                |                                                    |
| 112 | *** The sequences that highlighted in bold italics are the tag sequences.                                 |                         |                                                                                |                                                    |
